# Supplementary material for: An Alkyne-Mediated SERS Aptasensor for Anti-Interference Ochratoxin A Detection in Real Samples
Source: MDPI journal article supplement (doi:10.3390/foods11213407), 2022-10-28
Supplement: s1 [file s1]

# An Alkyne-mediated SERS Aptasensor for Anti-interference

## Ochratoxin A Detection in Real Samples

Hao Wang<sup>1,2</sup>, Lu Chen<sup>1,2</sup>, Min Li<sup>1,2</sup>, Yongxin She<sup>3</sup>, Chao Zhu<sup>1,2,\*</sup>, Mengmeng Yan<sup>1,2,\*</sup>

<sup>1</sup> Institute of Quality Standard and Testing Technology for Agro-Products, Shandong Academy of Agricultural Sciences, Jinan, 250100, China;

<sup>2</sup> Shandong Provincial Key Laboratory Test Technology on Food Quality and Safety, Jinan, 250100, China.

<sup>3</sup> Institute of Quality Standard and Testing Technology for Agro-Products, Chinese Academy of Agricultural Science, Beijing 100081, China.

\* Corresponding Authors: [ndytzhuchao@126.com](mailto:ndytzhuchao@126.com) (C Z); [ynky202@163.com](mailto:ynky202@163.com) (M Y)

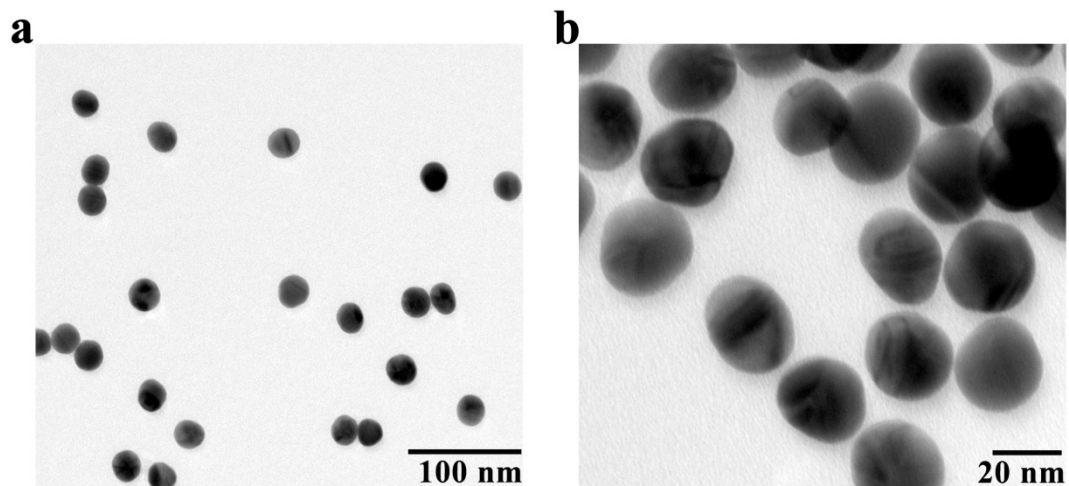

**Figure S1.** TEM images of (a) Au NPs and (b) 4-TEAE/Au NPs.

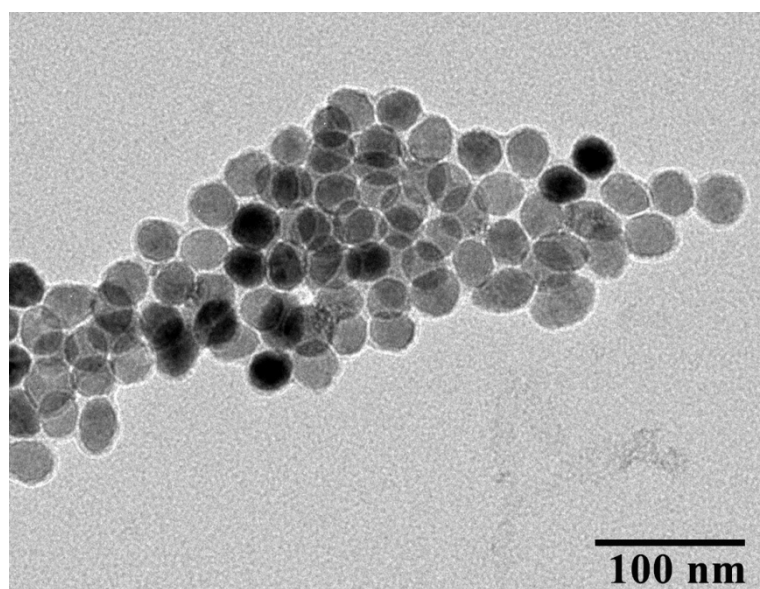

**Figure S2.** SEM images of Fe<sub>3</sub>O<sub>4</sub> NPs.

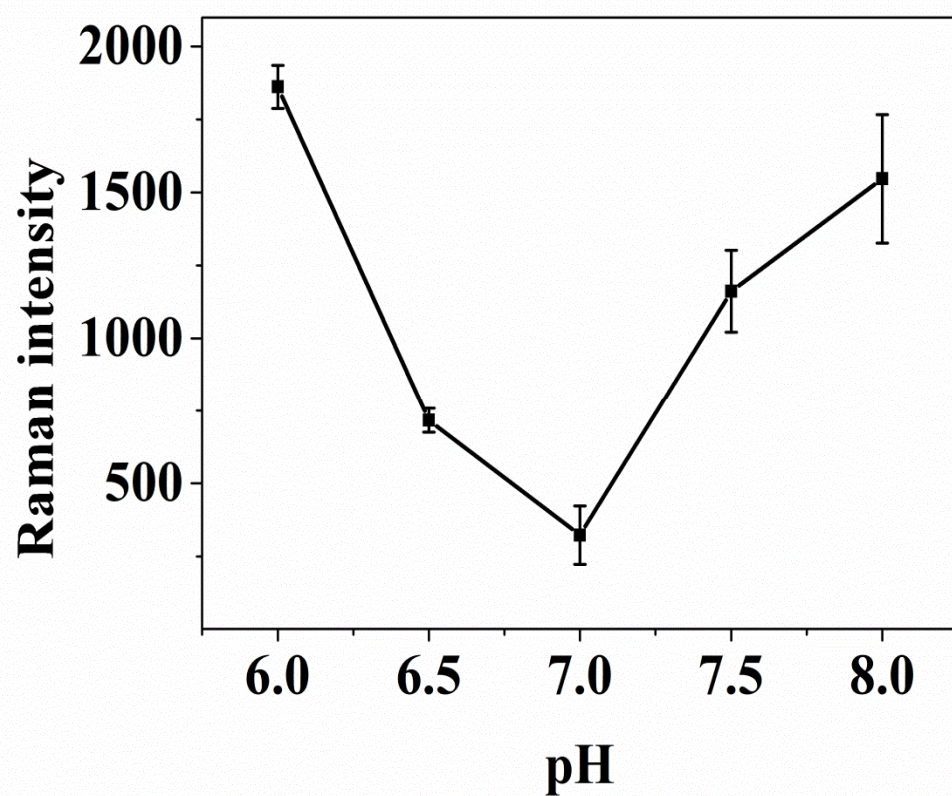

Figure S3. Raman intensity detected at  $1998\text{ cm}^{-1}$  for the optimization of pH

**Table S1.** Comparison of Different Methods for Pesticide Residues Detection

| Detection method | Pesticides   | Linear range           | LODs         | Real samples            | Ref.            |
|------------------|--------------|------------------------|--------------|-------------------------|-----------------|
| colorimetric     | Iprobenfos   | 1 $\mu$ M-100 $\mu$ M  | 1.67 $\mu$ M | Spiked rice             | [1]             |
|                  | Edifenphos   |                        | 38 nM        |                         |                 |
| electrochemical  | 1-Naphtol    | 0.1 $\mu$ M-10 $\mu$ M | 0.27 $\mu$ M | Fruit juices            | [2]             |
| fluorescence     | Omethoate    | 0-200 nM               | 0.22 nM      | Cabbage                 | [3]             |
|                  |              |                        |              | Lake water              |                 |
| electrochemical  | Acetamiprid  | 5-6000 nM              | 1 nM         | Apple                   | [4]             |
|                  |              |                        |              | Wastewater              |                 |
| fluorescence     | Thiamethoxam | 10-1000 nM             | 1.23 nM      | Tomato                  | [5]             |
| electrochemical  | Acetamiprid  | 0.25-2.0 mM            | 0.086 mM     | Environmental water     | [6]             |
| SERS             | OTA          | 0.1-150ng/mL           | 0.03ng/mL    | Fruit juice             | This aptasensor |
|                  |              |                        |              | soybean, grape and milk |                 |

## Reference

1. Kwon, Y.S.; Nguyen, V.T.; Park, J.G.; Gu, M.B. Detection of iprobenfos and edifenphos using a new multi-aptasensor. *Anal Chim Acta*. **2015**, 868:60-66. <https://doi.org/10.1016/j.aca.2015.02.020>
2. Selvolini, G.; Bajan, I.; Hosu, O.; Cristea, C.; Sandulescu, R.; Marrazza, G. DNA-Based Sensor for the Detection of an Organophosphorus Pesticide: Profenofos. *Sensors*. **2018**, 18. <https://doi.org/10.3390/s18072035>
3. Zhao, Y.; Wang, Y.; Yang, R.; Zhang, H.; Zhao, Y.; Miao, X.; Lu, L. A zero-background fluorescent aptasensor for ultrasensitive detection of pesticides based on magnetic three-dimensional DNA walker and poly(T) -templated copper nanoparticles. *Sens. Actuators, B*. **2021**, 343. <https://doi.org/10.1016/j.snb.2021.130172>
4. Fan, L.; Zhao, G.; Shi, H.; Liu, M.; Li, Z. A highly selective electrochemical impedance spectroscopy-based aptasensor for sensitive detection of acetamiprid. *Biosens. Bioelectron*. **2013**, 43:12-18. <https://doi.org/10.1016/j.snb.2021.130172>
5. Luo, Y.; Jin, Z.; Wang, J.; Ding, P.; Pei, R. The isolation of a DNA aptamer to develop a fluorescent aptasensor for the thiamethoxam pesticide. *Analyst*. **2021**, 146:1986-1995. <https://doi.org/10.1016/j.snb.2021.130172>
6. Rapini, R.; Cincinelli, A.; Marrazza, G. Acetamiprid multidetection by disposable electrochemical DNA aptasensor. *Talanta*. **2016**, 161:15-21. <https://doi.org/10.1016/j.talanta.2016.08.026>
